# Supplementary material for: Particulate matter 10 induces oxidative stress and apoptosis in rhesus macaques skin fibroblast
Source: PeerJ. 2023 Dec 18;11:e16589. doi: 10.7717/peerj.16589 (PMC10734408; doi:10.7717/peerj.16589)
Supplement: Supplemental Information 2 [file peerj-11-16589-s002.xlsx]

## Sheet: Figure 1
Figure 1B							Figure 1C							Figure 1D							Figure 1E
	0 ug/ml	1 ug/ml	5 ug/ml	10 ug/ml	50 ug/ml	100 ug/ml		0 ug/ml	1 ug/ml	5 ug/ml	10 ug/ml	50 ug/ml	100 ug/ml		0 ug/ml	1 ug/ml	5 ug/ml	10 ug/ml	50 ug/ml	100 ug/ml		Control	1ug/ml	5ug/ml	10ug/ml	50ug/ml	100ug/ml
	0.556	0.607	0.577	0.578	0.539	0.673		1.39	0.802	0.751	0.782	0.832	0.818		1.444	0.829	1.071	1	1.1	1.139		346000	276000	240000	328000	270000	217000
	0.627	0.599	0.592	0.628	0.853	0.658		0.702	0.904	0.811	0.859	0.822	0.879		1.204	0.941	1.267	1.072	1.118	1.197		692000	581000	483000	493000	313000	240000
	0.557	0.536	0.646	0.813	0.771	0.701		0.817	0.947	1.11	1.307	1.272	0.996		1.454	0.969	1.004	1.044	0.811	1.073		557000	457000	481000	422000	297000	252000
	0.653	0.698	0.686	0.699	0.807	0.756		0.889	0.972	0.898	0.969	0.852	1.072		1.369	1.148	0.857	0.721	0.792	0.847		593000	498000	497000	488000	250000	214000
	0.669	0.882	0.837	0.62	0.953	0.604		0.852	1.07	1.159	0.838	0.797	0.741		1.219	1.042	0.895	0.874	0.805	0.719		529000	549000	511000	459000	294000	209000
	0.724	0.696	0.696	0.753	0.837	0.852		0.777	1.09	1.01	0.529	0.899	0.86		1.148	0.979	1.078	0.875	0.957	0.94
	0.778	0.576	0.689	0.552	0.804	0.801		0.751	1.113	0.811	1.041	1.002	1.003		1.238	0.868	1.043	0.965	0.985	0.931
	0.679	0.564	0.502	0.629	0.603	0.637		1.051	0.783	0.706	0.621	0.708	0.738		0.869	0.89	1.042	1.142	1.063	0.927
	0.633	0.501	0.663	0.634	0.504	0.491		0.752	0.581	0.656	0.673	0.622	0.686		1.04	0.727	0.909	0.947	0.966	0.929
	0.601	0.584	0.653	0.703	0.444	0.474		0.788	1.083	1.034	1.129	1.037	0.919		0.912	1.066	0.9	0.821	0.828	0.791
	0.607	0.617	0.703	0.715	0.496	0.542		0.756	1.195	1.128	1.05	1.024	1.022		0.812	1.207	0.658	0.635	0.62	0.79
	0.587	0.673	0.743	0.692	0.674	0.543		0.775	1.067	0.953	1.126	1.109	0.984		0.859	1.513	0.982	0.923	0.925	0.648
	0.523	0.67	0.648	0.701	0.689	0.54		0.718	0.997	1.147	1.072	1.065	1.037		0.898	1.303	1.173	1.068	1.177	1.085
	0.616	0.698	0.629	0.508	0.591	0.56		0.726	1.092	1.047	0.777	0.977	0.977		0.929	1.304	1.571	1.186	0.852	1.086
	0.643	0.67	0.487	0.605	0.516	0.489		0.995	0.841	1.065	0.683	0.899	0.925		0.862	1.177	1.261	1.309	1.018	0.716
	0.628	0.554	0.503	0.602	0.493	0.455		0.774	0.555	0.653	0.645	0.581	0.567		1.014	0.984	1.266	1.125	1.273	0.978
	0.596	0.518	0.767	0.514	0.523	0.467		0.734	0.583	0.547	0.575	0.617	0.658		1.176	0.802	1.11	1.111		1.012
	0.56	0.604	0.527	0.629	0.723	0.508		0.899	1.071	0.906	1.136	0.985	0.773		1.084		1.17	1.294		0.771
	0.566	0.546	0.604	0.846	0.644	0.706		0.785	0.774	1.114	1.012	1.135	0.872		1.261		0.831	0.837		0.822
	0.577	0.738	0.671	0.528	0.578	0.67		0.753	0.884	0.941	0.958	1.051	0.682		1.261
	0.561	0.576	0.591	0.569	0.804	0.837		1.102	1.06	0.867	1.102	0.849	0.851		1.215
	0.647	0.603	0.546	0.528	0.728	0.763		1.051	0.933	0.985	1.267	1.058	0.784		1.203
	0.565	0.73	0.549	0.641	0.545	0.809		0.745	0.938	0.999	1.069	0.93	0.586		1.171
	0.667	0.553	0.7	0.526	0.548	0.555		0.832	0.577	0.601	0.674	0.638	0.593		1.219
	0.483	0.584	0.544	0.55	0.52	0.451		0.856	0.584	0.7	0.641	0.52	0.451
	0.52	0.775	0.571	0.597	0.741	0.772		1.066	0.775	0.544	0.526	0.741	0.772
	0.626	0.664	0.624	0.669	0.886	0.89		0.836	0.664	0.571	0.55	0.912	0.89
	0.516	0.666	0.588	0.565	0.627	0.764		1.295	0.666	0.624	0.597	0.983	1.027
	0.44	0.713	0.565	0.602	0.769	0.567		1.041	0.713	0.588	0.669	0.769	1.052
	0.666	0.709	0.628	0.463	0.736	0.911		0.91	0.709	0.565	0.565	0.736	0.911
	0.785	0.845	0.386	0.597	0.733	0.743		0.943	0.845	0.628	0.602	0.733	0.743
	0.416	0.421	0.614	0.797	0.432	0.426		0.793	1.074	0.981	0.463	0.432	0.426
	0.776	0.652	0.876	0.956	0.545	0.564		0.776	0.652	0.614	0.597	0.545	0.564
	0.714	0.883	0.979	0.884	0.879	0.854		0.714	0.883	0.876	0.797	0.879	0.854
	0.77	0.953	0.534	0.596	0.758	0.687		0.77	0.953	0.979	0.956	0.994	0.911
	0.702	0.921	0.972	0.751	0.658	0.751			0.921	1.008	0.98	1.131	0.787
	0.682	0.873	0.8	0.631	0.928	0.699			0.873	0.972	1.009	1.017	0.989
	0.913	0.694	0.731	0.959	0.7	0.849			0.694	1.003	1.036	0.984	0.968
	0.801	0.824	0.815	0.624	0.717	0.759			0.824	1.002	0.884	0.886	0.764
	0.899	0.602	0.794	0.844	0.679	0.816			0.602	0.534	0.596	0.627	0.567
	0.754	0.851	0.922	0.875		0.672			1.214	1.072	0.818	0.751	1.14
	0.75	0.824	0.923	0.924		0.7			1.034	0.888	0.842	0.829	1.118
	0.744	0.709	0.749	0.893		0.648				1.108	1.027		1.103
	0.779	0.899				0.605				1.222	0.898		0.98
	0.963					0.679					1.272		0.765
	0.983
	0.966
	0.828
	0.696
Mean	0.673306	0.683068	0.670326	0.674186	0.674375	0.6644	Mean	0.868971	0.871238	0.872227	0.849311	0.862619	0.840111	Mean	1.119	1.044	1.057	0.9973	0.9556	0.9158	Mean	543400	472200	442400	438000	284800	226400
S.E.M	0.01891	0.01925	0.02083	0.02023	0.02197	0.01985	S.E.M	0.02778	0.02905	0.03107	0.0344	0.02934	0.02689	S.E.M	0.03858	0.05052	0.04699	0.04144	0.04205	0.03594	Std. Error of Mean	56525	53445	50888	30267	11088	8322

## Sheet: Figure 2
Figure 2B
	24H			48H			72H
	0 ug/ml	PM10(50ug/ml)		0 ug/ml	PM10(50ug/ml)		0 ug/ml	PM10(50ug/ml)
	0	0		0	17.561		0	367.567
	0	0		0	34.0694		0	0
	0	0		0	27.2727		0	426.742
	0	0		0	8.78049		12	634.179
	0	12		0	38.4146		0	242.669
	0	0		0	75.8621		0	319.203
	0	0		0	103.053		0	818.47
	0	0		0	39.1304		0	462.005
	12	0		12	7.22892		0	248.269
	0	0		0	19.8895		0	523.284
	0	0		0	11.3924		0	307.381
	0	0		0			0
Mean	1	1		1	34.79		1	395.4
S.E.M	1	1		1	9.014		1	65.6
Figure 2C
BAX
	Control	PM10		Control Mi	control max	PM10 Mini	PM10 Maxi
	1	2.11498		0.917065	1.09043	1.90504	2.34806
	1	1.43479		0.692329	1.4444	1.2484	1.649
	1	1.74094		0.958382	1.04343	1.39465	2.17321
Mean	1	1.76357		0.855926	1.19275	1.51603	2.05676
CASP3
	0 ug/ml	PM10(50ug/ml)		Control Mi	control max	PM10 Mini	PM10 Maxi
	1	1.68724		0.91106	1.09762	1.54299	1.84497
	1	1.01979		0.770794	1.29736	0.703294	1.47872
	1	1.70188		0.905736	1.10407	1.41958	2.04032
Mean	1	1.46964		0.86253	1.16635	1.22196	1.788
TP53
	Control	PM10		Control Mi	control max	PM10 Mini	PM10 Maxi
	1	1.69714		0.904595	1.09685	1.54595	1.84949
	1	1.57975		0.852211	1.17342	1.4259	1.75019
	1	1.81556		0.978783	1.02168	1.67888	1.96337
Mean	1	1.69748		0.911863	1.09731	1.55024	1.85435
CYCS
CYCS	Control	PM10		Control Mi	control max	PM10 Mini	PM10 Maxi
R0100 1	1	1.50725		0.959596	1.04211	1.44079	1.57678
R0100 2	1	1.78096		0.815508	1.22623	1.67027	1.89898
R1055 1	1	1.65805		0.929166	1.07623	1.47665	1.86173
	1	1.64875		0.901423	1.11486	1.52924	1.77916

## Sheet: Figure 3
Figure 3B													Figure 3C		Figure 3E			Figure 3G			Figure 3H
1				2				3					Control	PM10		Control	PM10		Control	PM10	CAT
Control	Control	50ug/ml	51ug/ml	Control	Control	50ug/ml	51ug/ml	Control	Control	50ug/ml	51ug/ml		0.68744	0.761075		1.21913	1.85228		0.928007	1.08683		Control	PM10		Control Mi	control max	PM10 Mini	PM10 Maxi
12.5339	0.148672	11.9176	0.14076	5.21234	0.0613833	5.54718	0.0653234	6.6565	0.0786989	5.38953	0.0634134		0.529098	0.868913		0.968767	1.11129		0.993912	1.01811		1	1.84648		0.937894	1.06622	1.71178	1.99178
12.5636	0.149025	11.9959	0.141685	5.24357	0.061751	5.61485	0.0661202	6.73392	0.0796142	5.4385	0.0639895		0.690275	0.825659		1.24722	1.39636		1.02904	1.05766		1	1.45333		0.844759	1.18377	1.37428	1.53691
12.7245	0.150933	12.0838	0.142724	5.31261	0.0625642	5.67904	0.0668761	6.82198	0.0806553	5.51351	0.0648721	Mean	0.6353	0.8187		1.03762	1.53894		0.88736	0.9654		1	1.01519		0.928989	1.07644	0.909879	1.13269
12.8141	0.151996	12.2247	0.144387	5.37421	0.0632896	5.73618	0.067549	6.92534	0.0818774	5.62237	0.066153	S.E.M	0.05317	0.03139		1.03718	1.50978		0.941495	0.980058	Mean	1	1.43833		0.903881	1.10881	1.33198	1.55379
12.9016	0.153034	12.2552	0.144748	5.39643	0.0635512	5.81297	0.0684533	6.97599	0.0824762	5.66913	0.0667031			.		1.44144	1.65473		0.910717	0.859579
12.9504	0.153613	12.3391	0.145739	5.45605	0.0642534	5.90726	0.0695637	7.05337	0.083391	5.76754	0.067861					1.21895	1.20739		1.07681	0.853804	GPX1
13.0866	0.155228	12.4038	0.146503	5.53021	0.0651267	5.99191	0.0705606	7.15082	0.0845432	5.8288	0.0685818					1.25704	1.57381		0.916492	0.824781		Control	PM10		Control Mi	control max	PM10 Mini	PM10 Maxi
13.1493	0.155971	12.5554	0.148294	5.60546	0.0660129	6.04037	0.0711312	7.25743	0.0858037	5.88909	0.0692912					1.27012	1.767		0.962074	0.884436		1	1.63069		0.948582	1.05421	1.53956	1.72721
13.2633	0.157324	12.6672	0.149614	5.64794	0.0665131	6.13611	0.0722586	7.3541	0.0869465	5.99344	0.0705189					1.08349	1.55257		0.914445	0.836112		1	1.25443		0.848841	1.17808	1.13424	1.38736
13.387	0.158792	12.7202	0.150241	5.71938	0.0673545	6.24247	0.0735111	7.45591	0.0881503	6.07382	0.0714648					1.18221	1.39841		0.880013	0.931735		1	1.46749		0.953141	1.04916	1.32702	1.62283
13.5157	0.160318	12.8983	0.152344	5.78465	0.0681232	6.33395	0.0745884	7.5285	0.0890084	6.15184	0.0723828					0.985985	1.40267		0.817361	0.746338	Mean	1	1.45087		0.900991	1.11362	1.33361	1.57913
13.6025	0.161348	12.9651	0.153133	5.87581	0.0691967	6.39692	0.07533	7.62926	0.0901997	6.24075	0.0734289					0.583415	1.00823		0.782489	0.810379
13.7037	0.162548	13.0695	0.154365	5.94635	0.0700274	6.48601	0.0763791	7.74683	0.0915897	6.333	0.0745142					0.694042	1.06459		0.781246	0.847371	GPX3
13.8875	0.164728	13.1911	0.155802	5.98421	0.0704733	6.59707	0.0776868	7.87351	0.0930875	6.43866	0.0757574					0.875545	1.7393		0.803361	0.797257		Control	PM10		Control Mi	control max	PM10 Mini	PM10 Maxi
13.9542	0.16552	13.2996	0.157083	6.07917	0.0715916	6.71765	0.0791068	7.98796	0.0944405	6.53226	0.0768588					0.882953	1.31066		0.960429	0.749445		1	2.4806		0.84966	1.17694	2.13454	2.88276
14.1094	0.16736	13.4363	0.158698	6.16351	0.0725848	6.78937	0.0799514	8.11269	0.0959152	6.66795	0.0784553					0.836134	1.56127		0.932612	0.722945		1	2.14589		0.665282	1.50312	1.69594	2.71521
14.191	0.168328	13.5489	0.160028	6.24681	0.0735658	6.91097	0.0813834	8.2234	0.0972241	6.75672	0.0794998					1.04684	0.840309		1.02853	0.674877		1	6.52157		0.865975	1.19525	5.09439	8.34856
14.3076	0.169711	13.6696	0.161454	6.33737	0.0746322	7.03537	0.0828483	8.32541	0.0984301	6.88517	0.0810111					0.855258	1.22726		1.00206	0.754819	Mean	1	3.71602		0.765629	1.34919	2.97496	4.64884
14.5059	0.172063	13.8495	0.163578	6.40452	0.0754231	7.15215	0.0842235	8.43568	0.0997339	7.01324	0.0825179					0.801918	1.40894		0.888639	0.732229
14.6544	0.173825	13.9402	0.164649	6.4882	0.0764086	7.3044	0.0860164	8.55083	0.101095	7.13715	0.0839758					0.853472	1.48481		1.16147	0.863418
14.8042	0.175601	14.0903	0.166423	6.60471	0.0777805	7.44683	0.0876937	8.70724	0.102945	7.28097	0.0856681					0.772184	1.39406		1.0074	0.851209
14.889	0.176608	14.1944	0.167653	6.68298	0.0787024	7.56078	0.0890356	8.80043	0.104046	7.40317	0.0871059					0.739886	1.57593		0.975416	0.719253
14.9947	0.177861	14.3584	0.16959	6.7593	0.0796011	7.71449	0.0908456	8.95326	0.105853	7.51832	0.0884607					0.90279	1.53117		1.0316	0.79627
15.1578	0.179796	14.5076	0.171351	6.88079	0.0810318	7.78468	0.0916722	9.09049	0.107476	7.66235	0.0901554					0.892138	1.14031		1.0207	0.727404
15.3018	0.181504	14.6327	0.172829	6.96161	0.0819836	7.99022	0.0940926	9.23162	0.109144	7.79571	0.0917245					0.940415	1.52371		1.0051	0.75014
15.4704	0.183503	14.8007	0.174814	7.08734	0.0834643	8.14205	0.0958805	9.36474	0.110718	7.9525	0.0935693					1.11019	1.25366		1.00089	0.664716
15.5697	0.184681	14.9535	0.176618	7.21612	0.0849809	8.3313	0.0981091	9.54014	0.112792	8.10468	0.0953599					1.22126	1.32566		0.991572	0.563281
15.8193	0.187643	15.1941	0.179459	7.33608	0.0863936	8.48051	0.0998662	9.69667	0.114642	8.24088	0.0969625					1.19435	1.41406		1.04421	0.746667
15.9199	0.188835	15.2979	0.180686	7.47456	0.0880243	8.61711	0.101475	9.83757	0.116308	8.40542	0.0988984					1.01415	1.33828		1.004	0.7512
16.0802	0.190737	15.4883	0.182935	7.5917	0.0894039	8.78891	0.103498	9.98087	0.118002	8.58931	0.101062					1.03043	1.50911		1.04907	0.87972
16.3019	0.193366	15.7169	0.185635	7.72453	0.0909682	8.97489	0.105688	10.1648	0.120177	8.75591	0.103022					1.09742	1.44282		0.961672	0.925777
16.4774	0.195449	15.8701	0.187444	7.88531	0.0928616	9.21455	0.10851	10.3346	0.122185	8.93363	0.105113					1.20667	1.52658		1.01486	0.774265
16.6604	0.197619	16.0431	0.189487	7.96606	0.0938125	9.40613	0.110766	10.503	0.124176	9.14141	0.107558					0.833054	1.12968		1.06504	0.810014
16.8567	0.199948	16.238	0.191789	8.11267	0.0955391	9.59083	0.112941	10.6529	0.125948	9.29298	0.109341					0.874251	1.41789		1.10119	1.02059
17.0191	0.201874	16.4379	0.194151	8.27287	0.0974257	9.77001	0.115051	10.8491	0.128267	9.49071	0.111668					0.792087	1.03399		1.17021	0.88078
17.1505	0.203433	16.6648	0.19683	8.41786	0.0991333	9.96407	0.117337	11.0835	0.131039	9.6641	0.113708				Mean	1	1.394		1.09275	0.76297
17.4629	0.207138	16.885	0.199431	8.6037	0.101322	10.2652	0.120883	11.2612	0.133139	9.88476	0.116304				S.E.M	0.03243	0.03751		1.0433	0.916163
17.6805	0.209719	17.0969	0.201934	8.70463	0.10251	10.473	0.12333	11.454	0.135419	10.059	0.118355								1.10313	0.839585
17.8185	0.211356	17.2977	0.204306	8.88047	0.104581	10.7133	0.12616	11.6615	0.137872	10.2819	0.120977								1.14506	0.86594
18.0456	0.21405	17.5464	0.207244	9.06078	0.106705	10.9372	0.128796	11.8316	0.139884	10.4688	0.123176								1.33714	0.913166
18.3459	0.217612	17.757	0.209731	9.17891	0.108096	11.1932	0.13181	12.0542	0.142515	10.7307	0.126258								1.26587	0.870143
18.5462	0.219988	18.0044	0.212652	9.33879	0.109979	11.4647	0.135008	12.2684	0.145048	11.0155	0.129609								1.18965	0.809685
18.8071	0.223083	18.2554	0.215617	9.54502	0.112407	11.7012	0.137793	12.5269	0.148103	11.229	0.13212								1.04132	0.778761
19.0231	0.225644	18.5253	0.218806	9.73405	0.114633	11.9917	0.141214	12.7649	0.150918	11.5216	0.135563								1.01208	0.884874
19.2567	0.228416	18.7976	0.222021	9.90823	0.116685	12.2555	0.14432	13.0225	0.153963	11.7426	0.138164								1.22043	1.05463
19.5256	0.231605	19.0325	0.224795	10.0816	0.118726	12.5373	0.147639	13.2549	0.156711	12.015	0.141369								1.07221	1.04106
19.7537	0.234311	19.3101	0.228075	10.2566	0.120788	12.7992	0.150723	13.5411	0.160094	12.244	0.144064								1.13775	0.942262
20.0067	0.237312	19.6488	0.232075	10.442	0.122971	13.1724	0.155118	13.801	0.163167	12.5625	0.14781								0.988282	0.846055
20.3396	0.24126	19.903	0.235077	10.6965	0.125968	13.4657	0.158572	14.0459	0.166063	12.8477	0.151166								1.12569	0.780113
20.604	0.244396	20.1323	0.237785	10.8804	0.128134	13.8533	0.163136	14.3625	0.169806	13.167	0.154923								1.03167	0.799084
20.8449	0.247254	20.4523	0.241565	11.0863	0.130559	14.2759	0.168112	14.6353	0.173031	13.5167	0.159038								0.940654	0.795502
21.129	0.250623	20.7921	0.245579	11.2991	0.133065	14.6192	0.172155	14.902	0.176184	13.7921	0.162279								0.94526	0.687086
21.4179	0.254051	21.0708	0.248871	11.5371	0.135868	15.034	0.17704	15.2236	0.179987	14.1188	0.166122								1.00119	0.757816
21.7104	0.25752	21.4467	0.253311	11.7401	0.138258	15.3993	0.181341	15.5025	0.183284	14.5076	0.170697								0.984883	0.735226
22.0374	0.261399	21.7801	0.257247	11.9509	0.14074	15.7805	0.185831	15.8592	0.187501	14.8804	0.175083								0.965766	0.837757
22.3646	0.265281	22.1357	0.261448	12.1719	0.143343	16.1423	0.190091	16.1762	0.19125	15.2371	0.17928								1.0411	0.675389
22.6786	0.269005	22.4143	0.264739	12.3816	0.145812	16.646	0.196023	16.5036	0.19512	15.5916	0.183451								1.0153	0.675389
22.9631	0.272379	22.7944	0.269228	12.627	0.148703	17.0681	0.200994	16.8042	0.198674	16.0109	0.188385								1.12993	0.738845
23.3535	0.277011	23.0691	0.272473	12.8489	0.151316	17.5362	0.206506	17.1021	0.202196	16.4228	0.193231								1.00641	0.72236
23.5556	0.279408	23.5158	0.277748	13.122	0.154532	18.1267	0.21346	17.4591	0.206417	16.8198	0.197902								1.0407	0.873323
23.8716	0.283155	23.8573	0.281783	13.3888	0.157674	18.6587	0.219724	17.8202	0.210686	17.1958	0.202326								1.12664	0.766114
24.2729	0.287916	24.2498	0.286418	13.6278	0.160489	19.1227	0.225189	18.2496	0.215763	17.6622	0.207814								1.11823	0.913056
24.5142	0.290778	24.5935	0.290478	13.9376	0.164137	19.5654	0.230402	18.6093	0.220015	18.1636	0.213714								1.04819	0.95703
24.9523	0.295974	24.9357	0.29452	14.1896	0.167104	20.301	0.239064	19.0824	0.225609	18.5582	0.218356								1.11275	0.749116
25.315	0.300277	25.4179	0.300214	14.5535	0.171389	20.8708	0.245774	19.4807	0.230317	19.1077	0.224822								0.937839	0.806249
25.4655	0.302062	25.7511	0.30415	14.8288	0.174632	21.3625	0.251564	19.8633	0.234841	19.603	0.23065								0.947014	0.901944
25.8392	0.306495	26.2051	0.309512	15.236	0.179427	21.9609	0.258611	20.2471	0.239378	20.1007	0.236506								0.930054	0.769623
26.2845	0.311776	26.5705	0.313829	15.5112	0.182668	22.6796	0.267074	20.6544	0.244194	20.7191	0.243782								1.00378	0.733874
26.5896	0.315396	27.0216	0.319156	15.8745	0.186947	23.2543	0.273841	21.1745	0.250344	21.2234	0.249715								0.902091	0.685843
26.9678	0.319882	27.3887	0.323491	16.1727	0.190458	24.0386	0.283078	21.6647	0.256139	21.879	0.257429								0.994314	0.909145
27.2397	0.323106	27.7962	0.328305	16.5128	0.194463	24.652	0.290301	22.163	0.26203	22.4789	0.264487								0.898728	0.861736
27.5975	0.327351	28.2851	0.33408	16.9164	0.199216	25.3321	0.29831	22.6969	0.268342	23.1168	0.271993								0.877966	0.811001
28.013	0.332279	28.7291	0.339324	17.2809	0.203509	26.0761	0.307071	23.1919	0.274194	23.685	0.278678								0.907281	0.893537
28.4652	0.337644	29.1993	0.344878	17.6171	0.207468	26.9308	0.317136	23.8242	0.28167	24.4976	0.28824								0.822624	0.794077
28.7345	0.340837	29.6586	0.350302	18.0364	0.212406	27.5654	0.324609	24.2784	0.28704	25.168	0.296128								0.907208	0.788886
29.1166	0.34537	30.0958	0.355466	18.4348	0.217098	28.3606	0.333974	24.7983	0.293187	25.9004	0.304745								0.924132	0.75226
29.5172	0.350122	30.6592	0.36212	18.8504	0.221993	29.3114	0.34517	25.39	0.300182	26.5968	0.312938								0.866451	0.724772
29.9376	0.355108	31.1057	0.367394	19.2131	0.226264	30.1302	0.354812	25.9262	0.306522	27.2493	0.320616								0.829825	0.700538
30.229	0.358565	31.6396	0.373699	19.6766	0.231723	31.0346	0.365462	26.512	0.313447	28.0458	0.329988								0.925887	0.828546
30.6563	0.363634	32.1349	0.37955	20.1223	0.236971	31.9283	0.375987	27.0707	0.320053	28.8448	0.339389							Mean	1	0.8226
31.0018	0.367731	32.6167	0.385241	20.6436	0.24311	32.86	0.386958	27.6258	0.326616	29.6827	0.349247							S.E.M	0.01201	0.01149
31.5082	0.373738	33.092	0.390854	21.1435	0.248998	33.7275	0.397174	28.2428	0.333911	30.5222	0.359125
31.8755	0.378095	33.6213	0.397106	21.567	0.253984	34.7569	0.409296	28.8669	0.341289	31.3453	0.36881
32.2557	0.382605	34.1716	0.403606	22.1509	0.260861	35.6749	0.420106	29.5716	0.349621	32.2861	0.379879
32.605	0.386748	34.6936	0.409771	22.6316	0.266522	36.6557	0.431656	30.2539	0.357688	33.2118	0.390771
33.0958	0.392569	35.1769	0.41548	23.1753	0.272924	37.5409	0.442081	30.8429	0.364651	34.1576	0.401899
33.5118	0.397504	35.791	0.422733	23.7396	0.279571	38.6933	0.455651	31.5922	0.37351	35.3162	0.415532
33.9942	0.403226	36.2829	0.428542	24.2547	0.285637	39.6931	0.467424	32.2964	0.381836	36.2517	0.426538
34.3255	0.407156	36.8325	0.435034	24.9762	0.294132	40.8837	0.481445	33.1494	0.391921	37.1824	0.437489
34.9565	0.414641	37.4289	0.442078	25.5857	0.301311	42.1234	0.496043	33.7932	0.399533	38.1261	0.448593
35.4269	0.42022	38.0888	0.449872	26.2174	0.30875	43.2122	0.508865	34.5028	0.407921	39.2093	0.461338
35.79	0.424527	38.5834	0.455714	26.8131	0.315765	44.3729	0.522533	35.2455	0.416703	40.2585	0.473683
36.3374	0.43102	39.1461	0.46236	27.5344	0.32426	45.7052	0.538223	36.0161	0.425814	41.3121	0.48608
36.7767	0.436231	39.7678	0.469704	28.07	0.330568	46.8021	0.55114	36.7781	0.434822	42.4245	0.499168
37.1302	0.440424	40.2892	0.475862	28.8008	0.339174	48.165	0.567189	37.5681	0.444162	43.5852	0.512825
37.5422	0.445311	40.8833	0.482878	29.4626	0.346967	49.3629	0.581296	38.525	0.455476	44.7922	0.527026
38.1027	0.45196	41.5599	0.49087	30.2271	0.35597	50.9336	0.599792	39.3809	0.465595	45.9912	0.541134
38.4731	0.456353	42.1243	0.497536	30.8242	0.363002	52.5421	0.618734	40.1866	0.475121	47.1403	0.554654
39.061	0.463326	42.6656	0.50393	31.8602	0.375203	54.2019	0.63828	41.1698	0.486745	48.6238	0.572109
39.4864	0.468373	43.2248	0.510534	32.6872	0.384942	55.6398	0.655213	42.1517	0.498354	49.7476	0.585331
39.9761	0.474181	43.7677	0.516946	33.425	0.393631	57.0835	0.672213	43.063	0.509128	51.147	0.601797
40.4828	0.480191	44.3898	0.524294	34.4253	0.405411	58.5895	0.689948	43.9565	0.519692	52.4418	0.617032
41.0606	0.487044	45.0618	0.532232	35.242	0.415028	59.9617	0.706107	44.9727	0.531706	54.0005	0.635372
41.4571	0.491748	45.5834	0.538393	36.087	0.42498	61.5575	0.724899	45.8266	0.541801	55.1945	0.64942
41.9075	0.497091	46.1654	0.545266	36.9777	0.435469	63.1548	0.743709	46.8121	0.553454	56.4507	0.664201
42.4147	0.503106	46.6791	0.551334	37.7743	0.44485	64.6086	0.760829	47.7644	0.564712	57.76	0.679606
43.0136	0.510211	47.2791	0.55842	38.7854	0.456758	65.9403	0.776511	48.9025	0.578167	59.0629	0.694935
43.4331	0.515186	47.8723	0.565427	39.7734	0.468392	67.3046	0.792577	49.8701	0.589608	60.2939	0.70942
43.9335	0.521122	48.5376	0.573285	40.8183	0.480698	68.6588	0.808524	50.9382	0.602236	61.5007	0.723619
44.5403	0.528319	49.1641	0.580684	41.7643	0.491839	69.9455	0.823676	52.0052	0.61485	62.7704	0.738558
45.1244	0.535247	49.7338	0.587413	42.7619	0.503586	71.3998	0.840802	52.9819	0.626398	63.9168	0.752046
45.7204	0.542318	50.2822	0.59389	43.9859	0.518002	72.6264	0.855246	54.1227	0.639886	65.3019	0.768344
46.3549	0.549843	50.9127	0.601338	44.9282	0.529098	73.7869	0.868913	55.1604	0.652154	66.4899	0.782322
46.7716	0.554787	51.5219	0.608533	46.0445	0.542244	74.8789	0.881772	56.1948	0.664384	67.8156	0.79792
47.2788	0.560803	52.1524	0.61598	47.3396	0.557497	75.9225	0.89406	57.3467	0.678002	68.8865	0.810521
47.9192	0.568399	52.7608	0.623165	48.5185	0.57138	77.0946	0.907864	58.3848	0.690275	70.1731	0.825659
48.5406	0.57577	53.4215	0.630969	49.5008	0.582948	77.9425	0.917848	59.3685	0.701906	71.0924	0.836475
49.1483	0.582978	54.0295	0.638151	50.5462	0.595259	78.9258	0.929428	60.3884	0.713964	71.9569	0.846647
49.6176	0.588545	54.6689	0.645702	51.6682	0.608472	79.7114	0.938679	61.4793	0.726862	72.986	0.858755
50.2663	0.596239	55.3518	0.653768	52.9194	0.623207	80.389	0.946659	62.6296	0.740461	73.7874	0.868185
50.8953	0.6037	56.0941	0.662536	54.102	0.637134	81.0084	0.953952	63.6537	0.752569	74.7352	0.879336
51.5244	0.611163	56.7032	0.669729	55.1894	0.64994	81.6513	0.961523	64.7663	0.765724	75.4933	0.888257
52.1096	0.618104	57.375	0.677665	56.3266	0.663332	82.187	0.967832	65.8103	0.778066	76.1561	0.896055
52.7094	0.625218	58.1615	0.686955	57.5462	0.677694	82.6792	0.973627	66.752	0.789199	76.9463	0.905352
53.4346	0.633821	58.8287	0.694835	58.7634	0.692029	83.2094	0.979871	67.6998	0.800406	77.5394	0.91233
53.8963	0.639297	59.498	0.70274	59.8879	0.705272	83.5834	0.984275	68.7078	0.812324	78.0396	0.918217
54.4281	0.645605	60.1984	0.711012	61.0032	0.718406	83.895	0.987945	69.6805	0.823823	78.5933	0.924731
55.0928	0.653489	60.936	0.719724	62.0819	0.73111	84.2334	0.99193	70.4682	0.833136	79.2175	0.932076
55.5823	0.659296	61.6395	0.728033	63.1716	0.743942	84.4211	0.99414	71.4047	0.844208	79.7746	0.93863
56.2862	0.667645	62.3373	0.736275	64.2532	0.75668	84.5453	0.995603	72.4266	0.856289	80.2588	0.944328
56.8689	0.674556	62.9651	0.74369	65.4282	0.770518	84.7037	0.997468	73.2994	0.866609	80.7337	0.949915
57.4105	0.680981	63.6196	0.75142	66.4307	0.782324	84.7739	0.998295	73.9881	0.874751	81.2537	0.956034
57.9551	0.68744	64.437	0.761075	67.4114	0.793873	84.8133	0.998759	74.7898	0.88423	81.6712	0.960946
58.6512	0.695697	65.096	0.768859	68.3928	0.80543	84.8547	0.999247	75.5231	0.892899	81.9909	0.964707
59.3593	0.704097	65.7231	0.776266	69.5906	0.819536	84.8942	0.999712	76.1633	0.900469	82.3562	0.969006
60.0433	0.71221	66.4364	0.78469	70.5548	0.830891	84.9209	1.00003	76.749	0.907393	82.7306	0.97341
60.5941	0.718744	67.0217	0.791603	71.542	0.842517	84.9366	1.00021	77.2688	0.913538	83.0023	0.976607
61.2085	0.726032	67.5433	0.797764	72.5617	0.854525	84.9425	1.00028	77.8532	0.920447	83.2829	0.979909
61.8806	0.734004	68.1378	0.804786	73.379	0.86415	84.9481	1.00035	78.232	0.924927	83.5308	0.982825
62.3196	0.73921	68.7149	0.811601	74.2227	0.874086	84.9518	1.00039	78.7461	0.931005	83.7688	0.985627
62.9518	0.74671	69.2584	0.818021	75.155	0.885065	84.9587	1.00047	79.2315	0.936744	83.9749	0.988051
63.579	0.754149	69.8329	0.824806	75.8763	0.89356	84.9572	1.00045	79.5771	0.940829	84.1432	0.990032
64.1931	0.761434	70.4202	0.831744	76.7178	0.90347	84.9637	1.00053	80.0119	0.94597	84.394	0.992983
64.6985	0.767428	70.9291	0.837754	77.5429	0.913187	84.9616	1.00051	80.2972	0.949343	84.505	0.994288
65.1052	0.772253	71.388	0.843174	78.1971	0.92089	84.9658	1.00055	80.6966	0.954065	84.6268	0.995722
65.6188	0.778345	71.9229	0.849492	78.8281	0.928322	84.9678	1.00058	81.0189	0.957876	84.7024	0.99661
66.0678	0.78367	72.3232	0.85422	79.5168	0.936432	84.9683	1.00058	81.3493	0.961782	84.7646	0.997343
66.6739	0.79086	72.8729	0.860713	80.0862	0.943138	84.9635	1.00053	81.6021	0.964771	84.8442	0.998279
67.139	0.796377	73.265	0.865344	80.6796	0.950126	84.9671	1.00057	81.8624	0.967848	84.8819	0.998723
67.6356	0.802267	73.7394	0.870947	81.1475	0.955636	84.971	1.00062	82.1496	0.971244	84.9074	0.999023
68.0737	0.807464	74.2535	0.877019	81.5362	0.960214	84.9684	1.00059	82.3756	0.973915	84.9441	0.999455
68.576	0.813422	74.6615	0.881838	82.0042	0.965725	84.9731	1.00064	82.6059	0.976638	84.9461	0.999478
69.002	0.818475	75.0136	0.885996	82.3523	0.969825	84.9699	1.0006	82.7852	0.978758	84.9671	0.999725
69.3561	0.822675	75.5239	0.892024	82.6512	0.973345	84.9678	1.00058	82.9572	0.980791	84.9725	0.999789
69.7947	0.827878	75.9812	0.897425	82.9429	0.97678	84.9693	1.0006	83.1736	0.98335	84.9811	0.99989
70.2738	0.83356	76.3944	0.902306	83.1234	0.978905	84.9689	1.00059	83.3433	0.985356	84.9839	0.999923
70.7014	0.838633	76.8004	0.907101	83.3885	0.982027	84.9684	1.00059	83.4478	0.986592	84.9873	0.999963
71.0952	0.843303	77.2272	0.912142	83.5833	0.984321	84.9707	1.00061	83.5955	0.988338	84.9904	0.999999
71.4609	0.847642	77.6404	0.917022	83.7574	0.986372	84.9703	1.00061	83.7308	0.989938	84.9888	0.99998
71.9452	0.853386	78.056	0.921931	83.9309	0.988415	84.9712	1.00062	83.8594	0.991458	84.9928	1.00003
72.3147	0.857769	78.4484	0.926566	84.0755	0.990118	84.9665	1.00056	83.9764	0.992842	84.9937	1.00004
72.7048	0.862396	78.8334	0.931112	84.2091	0.991691	84.9702	1.00061	84.0466	0.993671	84.9952	1.00006
73.0053	0.86596	79.1868	0.935287	84.3145	0.992933	84.967	1.00057	84.1353	0.99472	84.9973	1.00008
73.4357	0.871065	79.5524	0.939606	84.4155	0.994122	84.9699	1.0006	84.206	0.995556	84.9977	1.00009
73.8448	0.875918	79.933	0.944101	84.5007	0.995125	84.97	1.0006	84.2696	0.996307	84.9978	1.00009
74.2464	0.880682	80.296	0.948388	84.5372	0.995555	84.9673	1.00057	84.3145	0.996839	84.9986	1.0001
74.5019	0.883712	80.6519	0.952592	84.6012	0.996309	84.9679	1.00058	84.3931	0.997768	84.9996	1.00011
74.8677	0.888051	80.9551	0.956173	84.6525	0.996913	84.9692	1.0006	84.4401	0.998324	84.999	1.0001
75.2371	0.892433	81.2375	0.959508	84.6934	0.997395	84.9682	1.00058	84.4839	0.998842	84.9997	1.00011
75.5736	0.896424	81.4817	0.962392	84.7251	0.997768	84.9673	1.00057	84.5065	0.999109	84.9997	1.00011
75.8849	0.900118	81.8123	0.966297	84.7594	0.998172	84.9686	1.00059	84.5591	0.99973	84.9999	1.00011
76.2277	0.904184	82.0614	0.969239	84.7715	0.998314	84.9657	1.00055	84.5635	0.999782	84.9996	1.00011
76.5396	0.907883	82.3324	0.97244	84.7805	0.99842	84.9656	1.00055	84.5821	1	85	1.00011
76.874	0.91185	82.5373	0.97486	84.8054	0.998713	84.9699	1.0006	84.6004	1.00022	84.9997	1.00011
77.1728	0.915394	82.7728	0.977642	84.8167	0.998847	84.9686	1.00059	84.6202	1.00045	85	1.00011
77.4244	0.918378	82.9189	0.979367	84.83	0.999004	84.968	1.00058	84.6297	1.00057	85	1.00011
77.7799	0.922595	83.1049	0.981564	84.8432	0.999159	84.9652	1.00055	84.6477	1.00078	84.9999	1.00011
78.0802	0.926156	83.2003	0.982691	84.8646	0.99941	84.9655	1.00055	84.6794	1.00115	85	1.00011
78.3197	0.928998	83.3536	0.984501	84.8651	0.999416	84.9661	1.00056	84.6672	1.00101	85	1.00011
78.6014	0.93234	83.5082	0.986327	84.8775	0.999563	84.9664	1.00056	84.6931	1.00131	84.9998	1.00011
78.8563	0.935362	83.5782	0.987154	84.8856	0.999658	84.9658	1.00055	84.6872	1.00125	84.9994	1.00011
79.1727	0.939115	83.6846	0.988411	84.889	0.999698	84.96	1.00049	84.6938	1.00132	85	1.00011
79.3538	0.941264	83.7748	0.989476	84.8708	0.999484	84.9652	1.00055	84.6864	1.00124	85	1.00011
79.6673	0.944983	83.8533	0.990404	84.8854	0.999656	84.9649	1.00054	84.7201	1.00163	85	1.00011
79.9235	0.948022	83.9071	0.991039	84.8876	0.999682	84.9591	1.00048	84.7014	1.00141	85	1.00011
80.1213	0.950368	83.9844	0.991952	84.9017	0.999848	84.9634	1.00053	84.7399	1.00187	85	1.00011
80.3473	0.953048	84.0506	0.992734	84.9032	0.999865	84.9652	1.00055	84.7248	1.00169	85	1.00011
80.5507	0.955461	84.0981	0.993295	84.902	0.999851	84.9617	1.00051	84.7282	1.00173	85	1.00011
80.7435	0.957748	84.131	0.993684	84.9119	0.999968	84.9589	1.00047	84.7353	1.00181	85	1.00011
80.9197	0.959838	84.2006	0.994506	84.9173	1.00003	84.9597	1.00048	84.7529	1.00202	85	1.00011
81.121	0.962226	84.2159	0.994686	84.9213	1.00008	84.9612	1.0005	84.755	1.00205	85	1.00011
81.3328	0.964738	84.2632	0.995245	84.9136	0.999988	84.9612	1.0005	84.763	1.00214	84.9999	1.00011
81.4731	0.966402	84.3056	0.995746	84.9162	1.00002	84.9591	1.00048	84.7378	1.00184	85	1.00011
81.6352	0.968325	84.3273	0.996002	84.9184	1.00004	84.9539	1.00041	84.748	1.00196	85	1.00011
81.7894	0.970153	84.3457	0.996219	84.9046	0.999881	84.9592	1.00048	84.7619	1.00213	85	1.00011
81.9791	0.972404	84.3669	0.996469	84.9237	1.00011	84.9585	1.00047	84.7482	1.00197	85	1.00011
82.0783	0.97358	84.3887	0.996727	84.9255	1.00013	84.9592	1.00048	84.7569	1.00207	84.9998	1.00011
82.1903	0.974909	84.4157	0.997046	84.9258	1.00013	84.957	1.00045	84.756	1.00206	85	1.00011
82.2968	0.976172	84.4328	0.997248	84.9246	1.00012	84.955	1.00043	84.7601	1.00211	85	1.00011
82.4181	0.977611	84.4273	0.997183	84.9231	1.0001	84.9561	1.00044	84.7558	1.00206	85	1.00011
82.5202	0.978823	84.4644	0.997622	84.9218	1.00008	84.9529	1.0004	84.7561	1.00206	84.9994	1.00011
82.627	0.980089	84.4779	0.997781	84.9213	1.00008	84.9518	1.00039	84.7519	1.00201	84.9994	1.00011
82.7441	0.981479	84.5019	0.998064	84.9219	1.00009	84.9501	1.00037	84.758	1.00208	85	1.00011
82.8225	0.982408	84.4997	0.998038	84.925	1.00012	84.952	1.00039	84.7623	1.00213	84.9999	1.00011
82.9105	0.983452	84.5153	0.998223	84.9283	1.00016	84.9502	1.00037	84.7585	1.00209	84.9996	1.00011
82.9737	0.984201	84.536	0.998468	84.9304	1.00019	84.9478	1.00034	84.7513	1.002	84.9999	1.00011
83.0501	0.985107	84.5356	0.998463	84.9342	1.00023	84.9535	1.00041	84.7664	1.00218	85	1.00011
83.1066	0.985778	84.5379	0.998489	84.9204	1.00007	84.9521	1.00039	84.7653	1.00217	84.9988	1.0001
83.204	0.986934	84.5644	0.998803	84.9321	1.00021	84.9483	1.00035	84.7594	1.0021	84.9992	1.0001
83.1945	0.986821	84.5558	0.998701	84.9233	1.0001	84.9522	1.00039	84.7621	1.00213	84.9999	1.00011
83.2474	0.987448	84.5609	0.998761	84.918	1.00004	84.948	1.00034	84.7548	1.00204	84.9996	1.00011
83.2871	0.987919	84.5859	0.999057	84.9328	1.00021	84.9473	1.00034	84.7552	1.00205	84.9999	1.00011
83.3642	0.988834	84.5925	0.999135	84.9307	1.00019	84.9486	1.00035	84.7446	1.00192	85	1.00011
83.3981	0.989236	84.6013	0.999239	84.924	1.00011	84.9458	1.00032	84.7601	1.00211	84.9984	1.00009
83.4933	0.990365	84.6067	0.999302	84.9295	1.00018	84.9441	1.0003	84.7617	1.00213	85	1.00011
83.5271	0.990766	84.6042	0.999272	84.9256	1.00013	84.9479	1.00034	84.7547	1.00204	84.9996	1.00011
83.5576	0.991128	84.6107	0.99935	84.9269	1.00014	84.947	1.00033	84.7504	1.00199	84.9988	1.0001
83.6257	0.991936	84.623	0.999494	84.9205	1.00007	84.9422	1.00028	84.7555	1.00205	84.9995	1.00011
83.6521	0.992249	84.63	0.999577	84.9314	1.0002	84.9422	1.00028	84.7405	1.00188	84.9999	1.00011
83.7056	0.992883	84.6346	0.999632	84.9307	1.00019	84.9408	1.00026	84.7294	1.00174	84.9986	1.0001
83.7561	0.993483	84.6467	0.999774	84.9304	1.00019	84.9437	1.00029	84.7444	1.00192	85	1.00011
83.7505	0.993416	84.6438	0.99974	84.92	1.00006	84.9434	1.00029	84.7691	1.00221	84.9993	1.0001
83.7917	0.993904	84.6522	0.999839	84.9216	1.00008	84.9408	1.00026	84.7359	1.00182	84.9992	1.0001
83.83	0.994359	84.6658	1	84.9302	1.00018	84.9417	1.00027	84.7211	1.00165	84.9986	1.0001
84.3056	1			84.9195	1.00006	84.9382	1.00023	84.7452	1.00193	84.9987	1.0001
				84.9245	1.00012	84.9422	1.00028	84.7421	1.00189	84.9989	1.0001
				84.9192	1.00005	84.9397	1.00025	84.7381	1.00185	84.9996	1.00011
				84.9311	1.00019	84.9323	1.00016	84.728	1.00173	84.9995	1.00011
				84.9197	1.00006	84.9327	1.00016	84.7265	1.00171	85	1.00011
				84.9174	1.00003	84.935	1.00019	84.7171	1.0016	84.9988	1.0001
				84.9191	1.00005	84.9372	1.00022	84.7347	1.00181	84.9985	1.00009
				84.9221	1.00009	84.9342	1.00018	84.7173	1.0016	84.9978	1.00009
				84.9264	1.00014	84.9352	1.00019	84.737	1.00183	84.9985	1.00009
				84.9152	1.00001	84.9351	1.00019	84.7329	1.00179	84.9999	1.00011
				84.9178	1.00004	84.9336	1.00018	84.7366	1.00183	84.9989	1.0001
				84.9187	1.00005	84.9348	1.00019	84.7296	1.00175	84.9994	1.0001
				84.9145	0.999998	84.9254	1.00008	84.7133	1.00155	84.9999	1.00011
				84.9239	1.00011	84.9306	1.00014	84.7295	1.00175	84.9998	1.00011
				84.9222	1.00009	84.9259	1.00008	84.7147	1.00157	84.9986	1.0001
				84.917	1.00003	84.9301	1.00013	84.7032	1.00143	85	1.00011
				84.9423	1.00033	84.9244	1.00007	84.6712	1.00106	84.9971	1.00008
				84.9333	1.00022	84.9254	1.00008	84.7144	1.00157	84.999	1.0001
				84.9333	1.00022	84.927	1.0001	84.6982	1.00138	84.9958	1.00006
				84.925	1.00012	84.923	1.00005	84.7064	1.00147	84.9985	1.0001
				84.9304	1.00019	84.9233	1.00005	84.7061	1.00147	84.9973	1.00008
				84.9253	1.00013	84.9232	1.00005	84.6917	1.0013	84.9981	1.00009
				84.9177	1.00004	84.9196	1.00001	84.6917	1.0013	84.9962	1.00007
				84.9166	1.00002	84.9254	1.00008	84.6722	1.00107	84.9981	1.00009
				84.925	1.00012	84.9182	0.999994	84.683	1.0012	84.9954	1.00006
				84.9246	1.00012	84.9206	1.00002	84.6751	1.0011	84.9963	1.00007
				84.9222	1.00009	84.9182	0.999994	84.6679	1.00102	84.9971	1.00008
				84.92	1.00006	84.9163	0.999971	84.6586	1.00091	84.996	1.00007
				84.9318	1.0002	84.9123	0.999924	84.6604	1.00093	84.9969	1.00008
				84.909	0.999933	84.9174	0.999985	84.6571	1.00089	84.9955	1.00006
				84.9203	1.00007	84.9104	0.999902	84.6197	1.00045	84.9955	1.00006
				84.9146	0.999999	84.9168	0.999978	84.6218	1.00047	84.9966	1.00007
				84.9181	1.00004	84.9165	0.999975	84.6232	1.00049	84.9952	1.00006
				84.9174	1.00003	84.91	0.999898	84.6488	1.00079	84.9931	1.00003
				84.9151	1.00001	84.9101	0.999898	84.6459	1.00076	84.9962	1.00007
				84.9166	1.00002	84.9132	0.999936	84.6227	1.00048	84.9984	1.00009
				84.9047	0.999883	84.9187	1	84.6243	1.0005	84.9947	1.00005
				84.9013	0.999843			84.6285	1.00055	84.993	1.00003
				84.9146	1			84.6125	1.00036	84.9909	1
								84.6031	1.00025	84.9905	1
								84.5927	1.00013
								84.5819	1

## Sheet: Figure 4
	Figure 4B		Figure 4D			Figure 4E
	Control	PM10		Control	PM10	NDUFA1
	0.865673	1.08033		1.04093	0.960532		Control	PM10		Control Mi	control max	PM10 Mini	PM10 Maxi
	1.12639	1.25237		1.00116	0.948795		1	1.09126		0.926931	1.07883	0.971945	1.22522
	0.873202	1.43409		1.00129	1.02805		1	2.50087		0.753107	1.32783	1.64219	3.80856
	1.13474	1.36385		0.998112	1.08738		1	1.66571		0.985963	1.01424	1.4023	1.9786
				0.963475	1.0388	Mean	1	1.75261		0.869535	1.17103	1.33881	2.33746
Mean	1	1.283		0.973182	1.02663
S.E.M	0.07542	0.07712		1.09248	0.959213	NDUFA2
				1.06651	1.00329		Control	PM10		Control Mi	control max	PM10 Mini	PM10 Maxi
				1.00596	1.06843		1	1.45323		0.91606	1.09163	1.29356	1.63261
				1.01885	1.01546		1	1.56828		0.69326	1.44246	1.49486	1.64532
				1.01959	1.00616		1	1.74894		0.918368	1.08889	1.54748	1.97663
				1.05338	1.02463	Mean	1	1.59015		0.805814	1.26567	1.4453	1.75152
				0.937565	0.987152
				0.949437	1.03261	NDUFC2
				0.964659	1.05906		Control	PM10		Control Mi	control max	PM10 Mini	PM10 Maxi
				1.0801	1.16335		1	1.48499		0.93736	1.06683	1.31924	1.67157
				1.04415	1.17052		1	1.92434		0.74584	1.34077	1.73667	2.13229
				1.03167	1.1116		1	2.3659		0.793338	1.2605	1.93513	2.89256
				1.01952	1.09302	Mean	1	1.92508		0.769589	1.30063	1.66368	2.23214
				0.982552	1.03691
				1.00565	1.01025	NDUFS4
				1.05294	1.01472		Control	PM10		Control Mi	control max	PM10 Mini	PM10 Maxi
				1.05548	1.08041		1	1.44203		0.877301	1.13986	1.19299	1.74304
				1.02375	0.995676		1	1.89174		0.898354	1.11315	1.59	2.25074
				1.02825	1.04428		1	1.92602		0.967066	1.03406	1.51559	2.44759
				1.06316	1.19575	Mean	1	1.75326		0.93271	1.0736	1.43286	2.14712
				1.00207	1.02998
				1.00406	1.06556	ATP5H
				0.9767	1.15868		Control	PM10		Control Mi	control max	PM10 Mini	PM10 Maxi
				0.942266	1.13209		1	1.18454		0.880353	1.13591	0.971945	1.22522
				1.00532	1.06624		1	1.8216		0.905561	1.10429	1.71301	1.93706
				1.00718	1.01746		1	2.11887		0.980011	1.0204	1.85156	2.42477
				1.06231	1.05734	Mean	1	1.70833		0.942786	1.06234	1.51217	1.86235
				1.00917	1.00095
				1.00883	1.38582
				0.962054	1.3364
				0.942266	1.11379
				1.04141	1.24446
				1.00968	1.00559
				1.04124	1.09387
				1.00437	1.05149
				0.949065	1.06062
				0.93611	1.00728
				0.919773	1.112
				0.988911	1.06072
				0.991245	1.27937
				0.931645	1.19037
				1.00126	1.04449
				0.959686	1.02524
				1.01601	1.22362
				1.00038	0.924474
				1.01127	1.09915
				0.979947	0.941556
				0.978764	1.03921
				0.96706	1.1506
				0.959483	1.06705
				1.01452	1.03447
				0.96016	1.00532
				0.891123	1.02196
				1.02852	1.03637
				0.984142	1.20231
				1.00322	1.28532
				0.936347	1.08048
				0.942672	1.05176
				1.03552	1.17847
				0.935738	1.07029
				0.968616	0.956168
				0.955627	0.95654
				0.955796	1.04384
				0.911452	1.16994
				0.942435	1.18716
				0.987896	1.08142
				1.01164	1.09681
				0.962866	1.18537
				1.0729	0.988438
				1.05318	0.984277
				0.920145	1.20201
				0.92072	1.08169
				0.905837	1.08298
				0.964794	1.07608
				0.926808	1.05112
				0.958469	0.947205
				0.980049	1.06096
				1.00133	1.05352
				0.968582	1.06045
				0.888315	1.05196
				0.916559	1.0338
				1.02622	1.03123
				0.983228	1.16027
				1.04053	1.17596
				0.969326	1.12306
				0.911046	1.06032
				0.952921	1.144
				1.06482	0.997638
				0.920314	0.961986
				0.927282	1.03762
				0.940507	1.07631
				0.965403	0.992327
				1.13957	0.958874
				0.977309	0.966654
				1.01438	0.953259
				1.02666	1.03485
				1.03173	1.14765
				0.93266	1.19995
				0.967906	1.05599
				0.883038	0.982484
				1.10422	1.00809
				0.997503	0.997401
				0.924576	1.17989
				0.893423	1.0549
				0.938985	0.996826
				0.960836	1.03508
				0.898598	1.08349
				0.869339	1.16984
				1.01042	1.00839
				1.10825	1.29178
				1.00836	1.0249
				0.975449	1.07357
				1.08629	1.0709
				0.983296	1.14166
				0.925117	1.2933
				1.08403	1.24287
				1.08788	1.13977
				0.86068	1.1603
				0.989283	1.1464
				0.964895	1.15996
				0.92258	1.14647
				0.989621	1.19741
				1.11921	1.22782
				1.03211	1.23621
				1.00461	1.03863
				1.10172	0.948152
				1.05856	0.944736
				0.942368	0.92992
				0.942638	0.978899
				0.902759	0.993545
				0.875529	0.93726
				0.915139	0.905092
				0.965166	0.879757
				0.970071	0.913413
				0.974671	0.922851
				0.929819	1.03123
				0.935535	1.01976
				0.933404	0.888653
				0.921227	0.966316
				0.93063	1.05321
				0.91294	1.02358
				1.06292	1.19792
				1.03319	1.14427
				1.04421	1.06715
				1.01458	1.0044
				1.02047	1.04164
				1.01381	1.18334
				0.930258	1.18625
				1.10202	1.00085
				1.04361	1.06894
				1.1187	1.04029
				1.02368	0.983804
				0.978087	1.00765
				0.954105	0.979745
				0.905532	1.46517
				0.955255	1.26252
				0.95512	1.28535
				0.909524	1.21892
				0.954985	0.944871
				0.92417	0.929277
				0.940744	0.936415
				0.891968	1.05612
				0.943213	1.03437
				0.970138	1.00352
				0.943518	0.85953
				0.914597	0.997097
				0.947949	0.935264
				0.996386	1.10152
				0.937023	0.926571
				0.922276	0.974941
				0.959416	0.992835
				0.997334	1.01607
				1.11214	1.01976
				1.12316	0.980962
				1.05216	0.918453
				0.990467	0.940676
				0.905465	1.12144
				0.917067	0.993647
				0.965538	0.962189
				1.09137	1.13554
				0.953733	1.18973
				0.980218	0.934182
				0.932863	0.905228
				0.92603	0.952854
				0.936854	0.924982
				0.926098	1.1577
				0.919908	1.39021
				0.887909	1.28316
				0.913549	1.09275
				0.921126	1.06871
				1.02077	1.13013
				0.998687	1.03251
				1.02267	1.11975
				1.04625	1.13216
				0.999295	1.16744
				0.959449	1.11298
				0.955424	1.11799
				0.952617	1.10311
				0.904957	0.979237
				1.06289	1.00004
				1.17404	0.969665
				1.08602	1.29479
				1.06363	1.13345
				1.06603	1.22254
				1.08454	1.35747
				0.982281	1.11088
				0.99412	1.08782
				1.01201	1.02588
				1.09475	1.26604
				1.07462	1.17843
				1.11714	1.10723
				1.14356	1.23824
				1.01956	1.16984
				1.04973	1.04736
				1.00904	1.06661
				0.969462	1.01174
				1.09194	1.01688
				1.07621	1.00068
				1.10669	1.01137
				1.15919	1.00227
				1.23834	0.964117
				1.2493	1.43513
				1.17278	1.12381
				1.08142	1.1489
				1.17383	1.10628
				1.16203	1.12164
				1.14136	1.11498
				1.25099	0.985461
				1.14329	0.982755
				1.13561	1.12157
				1.10973	1.17376
				1.06089	1.1095
				1.0246	1.27852
				0.946731	1.04618
				1.09316	1.01587
				1.02135	1.03153
				0.999295	1.07638
				1.02226	1.31468
				1.00988	1.22707
				1.08765	1.20661
				1.04036	1.26465
				1.09218	1.30135
				0.973757	1.13913
				0.974908	1.01861
				0.993376	1.01814
				0.9767	0.933776
				0.964997	0.981706
				1.02541	0.951095
				0.971796	1.0065
				0.936787	1.01323
				0.983059	0.912974
				0.959077	0.906175
				0.956135	1.07933
				0.930191	0.982721
				1.00677	0.932592
				0.997131	0.91913
				1.02751	0.950959
				0.978797	0.947644
				1.01418	0.993105
				0.993748	0.999431
				0.971796	1.01702
				0.978967	0.929311
				0.948321	1.09871
				0.955221	1.11549
				0.980895	1.0203
				0.925929	1.01729
				0.948118	1.07246
				0.934825	1.0248
				0.956642	0.970815
				0.961919	1.00447
				0.99456	0.892273
				0.920584
				0.980489
				0.983702
				1.00948
				0.901169
				0.966113
				0.950418
				0.998788
				1.04212
				1.05335
				0.964083
				1.00789
				1.01787
				1.01107
				0.980489
				0.94203
				1.09066
				1.06651
				1.07587
				1.10026
				1.03119
				1.01239
				1.03836
				1.00244
				0.990907
				1.02747
				1.00762
				1.11603
				1.11508
				1.07503
				1.04756
				1.12401
				1.03775
				1.11755
				1.02737
				1.00992
			Mean	1	1.069
			S.E.M	0.003859	0.006459
